# Supplementary material for: Ultrasonic assisted natural deep eutectic solvents as a green and efficient approach for extraction of hydroxytyrosol from olive leaves
Source: Royal Society of Chemistry journal article supplement (doi:10.1039/d3im00055a), 2023-09-15
Supplement: d3im00055a1.pdf [file d3im00055a1.pdf]

## Supporting Information

**Table S1** ESP analysis of each atom of matrine and panthenol.

Matrine

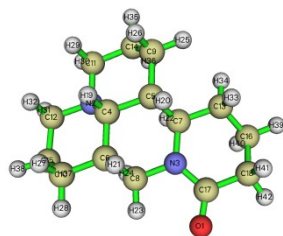

| Center    | Charge             |
|-----------|--------------------|
| <b>O1</b> | <b>-0.57354448</b> |
| N2        | -0.26061974        |
| N3        | -0.266543966       |
| C4        | -0.310307404       |
| C5        | 0.058151449        |
| C6        | 0.125157294        |
| C7        | -0.029193827       |
| C8        | -0.041567282       |
| C9        | -0.13603287        |
| C10       | -0.295618674       |
| C11       | -0.007831083       |
| C12       | -0.023100002       |
| C13       | -0.090944985       |
| C14       | 0.043166258        |
| C15       | 0.085319178        |
| C16       | -0.021305595       |
| C17       | 0.546006091        |
| C18       | -0.081554589       |
| H19       | 0.140849638        |
| H20       | 0.05808604         |
| H21       | 0.061188915        |
| H22       | 0.1109517          |
| H23       | 0.091362184        |
| H24       | 0.091362184        |
| H25       | 0.043511238        |
| H26       | 0.043511238        |
| H27       | 0.088330012        |
| H28       | 0.088330012        |
| H29       | 0.043810725        |
| H30       | 0.043810725        |

Panthenol

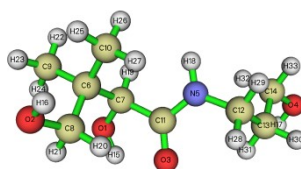

| Center     | Charge            |
|------------|-------------------|
| O1         | -0.535249689      |
| O2         | -0.594404042      |
| O3         | -0.528578736      |
| O4         | -0.655613516      |
| N5         | -0.482993995      |
| C6         | 0.552981933       |
| C7         | -0.070333729      |
| C8         | 0.11687838        |
| C9         | 0.00761118        |
| C10        | -0.802858832      |
| C11        | 0.630407585       |
| C12        | -0.260484583      |
| C13        | -0.025051132      |
| C14        | 0.321712424       |
| H15        | 0.339309766       |
| H16        | 0.372393263       |
| <b>H17</b> | <b>0.39402089</b> |
| H18        | 0.281087389       |
| H19        | 0.040935303       |
| H20        | 0.017726679       |
| H21        | 0.017726679       |
| H22        | -0.013782185      |
| H23        | -0.013782185      |
| H24        | -0.013782185      |
| H25        | 0.171943786       |
| H26        | 0.171943786       |
| H27        | 0.171943786       |
| H28        | 0.152555529       |
| H29        | 0.152555529       |
| H30        | 0.040267779       |

|     |             |     |             |
|-----|-------------|-----|-------------|
| H31 | 0.045950453 | H31 | 0.040267779 |
| H32 | 0.045950453 | H32 | 0.001322681 |
| H33 | 0.05037343  | H33 | 0.001322681 |
| H34 | 0.05037343  | Sum | 0           |
| H35 | 0.01594833  |     |             |
| H36 | 0.01594833  |     |             |
| H37 | 0.012053418 |     |             |
| H38 | 0.012053418 |     |             |
| H39 | 0.022338037 |     |             |
| H40 | 0.022338037 |     |             |
| H41 | 0.040966139 |     |             |
| H42 | 0.040966139 |     |             |
| Sum | 0           |     |             |

**Fig. S1** ESP analysis of matrine and panthenol.
